# Supplementary material for: Beneficial Agents for Patients With Type 2 Diabetes and Cardiovascular Disease or Obesity: Utilization in an Era of Accumulating Evidence
Source: Oxford University Press journal article supplement (doi:10.2337/cd19-0074), 2020-02-27
Supplement: cd190074supplementarydata.pdf [file cd190074supplementarydata.pdf]

SUPPLEMENTARY DATA

**Supplementary Appendix 1. Antidiabetic Drug Classifications Based on Published Standards of Care [8,9]**

|                     |                                |                                                                                                                                                                                                                                                             |
|---------------------|--------------------------------|-------------------------------------------------------------------------------------------------------------------------------------------------------------------------------------------------------------------------------------------------------------|
| <b>CVD drugs</b>    | Beneficial agents              | Albiglutide, canagliflozin, empagliflozin, liraglutide, semaglutide*                                                                                                                                                                                        |
|                     | Neutral                        | Alogliptin, exenatide, lixisenatide, <sup>*,†</sup> nonbasal insulin, pioglitazone, rosiglitazone, saxagliptin, sitagliptin                                                                                                                                 |
|                     | No position (treat as neutral) | Acarbose, bromocriptine, colesevelam, dapagliflozin, dulaglutide, ertugliflozin, linagliptin, miglitol, pramlintide                                                                                                                                         |
|                     | Suboptimal                     | Gliclazide, <sup>*,‡</sup> glimepiride, glipizide, glyburide, insulin glargine (Lantus, Toujeo, Basaglar), insulin detemir (Levemir), insulin degludec (Tresiba), <sup>*,†</sup> insulin isophane, insulin NPH (Humulin, Novolin), nateglinide, repaglinide |
| <b>Weight drugs</b> | Beneficial agents              | Canagliflozin, dapagliflozin, dulaglutide, empagliflozin, ertugliflozin, <sup>*</sup> exenatide, liraglutide, lixisenatide, <sup>*,†</sup> semaglutide*                                                                                                     |
|                     | Neutral                        | Alogliptin, linagliptin, saxagliptin, sitagliptin                                                                                                                                                                                                           |
|                     | No position (treat as neutral) | Acarbose, bromocriptine, colesevelam, miglitol,                                                                                                                                                                                                             |

SUPPLEMENTARY DATA

|  |                          |                                                                                                     |
|--|--------------------------|-----------------------------------------------------------------------------------------------------|
|  |                          | nateglinide, pramlintide, repaglinide                                                               |
|  | Suboptimal (weight gain) | Gliclazide <sup>*‡</sup> glimepiride, glipizide, glyburide,<br>insulin, pioglitazone, rosiglitazone |

\* Denotes a drug that was included on the list but did not appear in the file.

† Indicates a drug with no code in NAMCS, despite launch in 2016.

‡ No NAMCS code because it is no longer available in the United States.

CVD=cardiovascular disease; NAMCS = National Ambulatory Medical Care Survey.

SUPPLEMENTARY DATA

Supplementary Appendix 2. Charlson Comorbidity Index\* and Additional Study Diagnoses

| Condition                                                                        | CCI Weight | Method/ICD-9                                                                                                               | Method/ICD-10                                                                                                                               |
|----------------------------------------------------------------------------------|------------|----------------------------------------------------------------------------------------------------------------------------|---------------------------------------------------------------------------------------------------------------------------------------------|
| <b>Used in CCI</b>                                                               |            |                                                                                                                            |                                                                                                                                             |
| AMI                                                                              | 1          | 410, 412                                                                                                                   | I21, I22, I23, I252                                                                                                                         |
| CHF                                                                              | 1          | Chronic condition indicator                                                                                                | Chronic condition indicator                                                                                                                 |
| PAD/PVD                                                                          | 1          | 443.9 Peripheral vascular disease, unspecified                                                                             | I73.9 Peripheral vascular disease, unspecified                                                                                              |
| CVA (CEBVD, TIA)                                                                 | 1          | Chronic condition indicator and diagnosis code; e-Appendix 3                                                               | Chronic condition indicator and diagnosis code; e-Appendix 3                                                                                |
| Dementia                                                                         | 1          | Chronic condition indicator for Alzheimers/dementia                                                                        | Chronic condition indicator for Alzheimers/dementia                                                                                         |
| Pulmonary disease                                                                | 1          | 490, 491, 492, 493, 494, 495, 496, 500, 501, 502, 503, 504, 505 or chronic condition indicator for asthma or COPD          | J40, J41, J42, J43, J44, J45, J46, J47, J60, J61, J62, J63, J64, J65, J66, J67 or chronic condition indicator for asthma or COPD            |
| Connective tissue disorder/rheumatologic disease                                 | 1          | 5171, 7100, 7101, 7104, 7140, 7141, 7142, 71481, 725                                                                       | M05, M06, M32, M332, M34, M353                                                                                                              |
| Peptic ulcer                                                                     | 1          | 531, 532, 533, 534                                                                                                         | K25, K26, K27, K28                                                                                                                          |
| Diabetes that is not controlled by diet, or diabetes <i>and no</i> complications | 1          | All have diabetes by design, code yes if any drug and no complications listed below                                        | All have diabetes by design, code yes if any drug and no complications listed below                                                         |
| Diabetes complications                                                           | 2          | 2504, 2505, 2506                                                                                                           | E102, E112, E132, E142 E103, E113, E133, E143 E104, E114, E134, E144                                                                        |
| Paraplegia                                                                       | 2          | 342, 3441                                                                                                                  | G041, G81, G822                                                                                                                             |
| Renal disease                                                                    | 2          | Chronic condition indicators of CKD or ESRD and diagnosis codes:<br>582, 5830, 5831, 5832, 5834, 5836, 5837, 585, 586, 588 | Chronic condition indicators of CKD or ESRD and diagnosis codes:<br>N01, N03, N052, N053, N054, N055, N056, N072, N073, N074, N18, N19, N25 |
| Cancer                                                                           | 2          | Chronic condition indicator for cancer <i>and not</i> metastatic                                                           | Chronic condition indicator for cancer <i>and not</i> metastatic                                                                            |
| Metastatic cancer                                                                | 6          | 196, 197, 198, 1990, 1991                                                                                                  | C77, C78, C79, C7B <sup>†</sup>                                                                                                             |
| Liver disease (mild)                                                             | 1          | 5712, 5714, 5715, 5716 <i>and not</i> severe                                                                               | K702, K703, K717, K73, K740, K742, K743, K744, K745, K746 <i>and not</i> severe                                                             |
| Severe liver disease                                                             | 3          | 5722, 5723, 5724, 5728                                                                                                     | K721, K729, K766, K767                                                                                                                      |
| HIV                                                                              | 6          | 042                                                                                                                        | B20                                                                                                                                         |
| <b>Additional indicators</b>                                                     |            |                                                                                                                            |                                                                                                                                             |
| ASCVD                                                                            | None       | Medical condition codes for CAD and CEBVD, verified against diagnoses; <b>plus</b> diagnosis codes for PAD and other ASCVD | Medical condition codes for CAD and CEBVD, verified against diagnoses; <b>plus</b> diagnosis codes for PAD and other ASCVD                  |

SUPPLEMENTARY DATA

|             |      |                                                                                                                                                                                                                                                                                                                                                           |                                                                                                                                                                                                                                                                                                                                                                                                                                                                                                                                                                                                                                                  |
|-------------|------|-----------------------------------------------------------------------------------------------------------------------------------------------------------------------------------------------------------------------------------------------------------------------------------------------------------------------------------------------------------|--------------------------------------------------------------------------------------------------------------------------------------------------------------------------------------------------------------------------------------------------------------------------------------------------------------------------------------------------------------------------------------------------------------------------------------------------------------------------------------------------------------------------------------------------------------------------------------------------------------------------------------------------|
| Other ASCVD | None | 440.2 Atherosclerosis of native arteries of the extremities<br>440.3 Atherosclerosis of bypass graft of the extremities<br>440.4 Chronic total occlusion of artery of the extremities<br>440.8 Atherosclerosis of other specified arteries<br>440.9 Generalized and unspecified atherosclerosis<br>V4581 Aortocoronary bypass status<br>V4582 PTCA status | I70.2 Atherosclerosis of native arteries of the extremities<br>I70.3 Atherosclerosis of unspecified type of bypass graft(s) of the extremities<br>I70.4 Atherosclerosis of autologous vein bypass graft(s) of the extremities<br>I70.5 Atherosclerosis of nonautologous biological bypass graft(s) of the extremities<br>I70.6 Atherosclerosis of nonbiological bypass graft(s) of the extremities<br>I70.7 Atherosclerosis of other type of bypass graft(s) of the extremities<br>I70.8 Atherosclerosis of other arteries<br>I70.9 Other and unspecified atherosclerosis<br>Z951 Presence of bypass graft<br>Z955 Presence of angioplasty graft |
| Retinopathy | None | 362.0 Diabetic retinopathy                                                                                                                                                                                                                                                                                                                                | Diabetes mellitus with ophthalmic complications<br>E08.3<br>E09.3<br>E10.3<br>E11.3<br>E13.3                                                                                                                                                                                                                                                                                                                                                                                                                                                                                                                                                     |
| Obesity     | None | Body mass index >30 kilograms per squared meters body surface area; obesity indicator for patients with missing body mass index                                                                                                                                                                                                                           | Body mass index >30 kilograms per squared meters body surface area; obesity indicator for patients with missing body mass index                                                                                                                                                                                                                                                                                                                                                                                                                                                                                                                  |

\* Based on original index weights as reported by Quan et al. [17] † Updated based on code review with removal of ICD-9 and ICD-10 codes that are no longer in use.

ASCVD=atherosclerotic cardiovascular disease; AMI=acute myocardial infarction; CAD=coronary artery disease; CCI=Charlson comorbidity index; CEBVD=cerebrovascular disease; CHF=congestive heart failure; CVA=cerebral vascular accident; GFR=glomerular filtration ratio; HIV=human immunodeficiency virus; ICD=International Classification of Diseases; PAD=peripheral arterial disease; PVD=peripheral vascular disease; TIA=transient ischemic attack.
